# Supplementary material
Source: publisher figshare collection journal article supplement (https://frontiersin.figshare.com/ndownloader/files/21474024)
Supplement: Supplementary file [file 21474024]

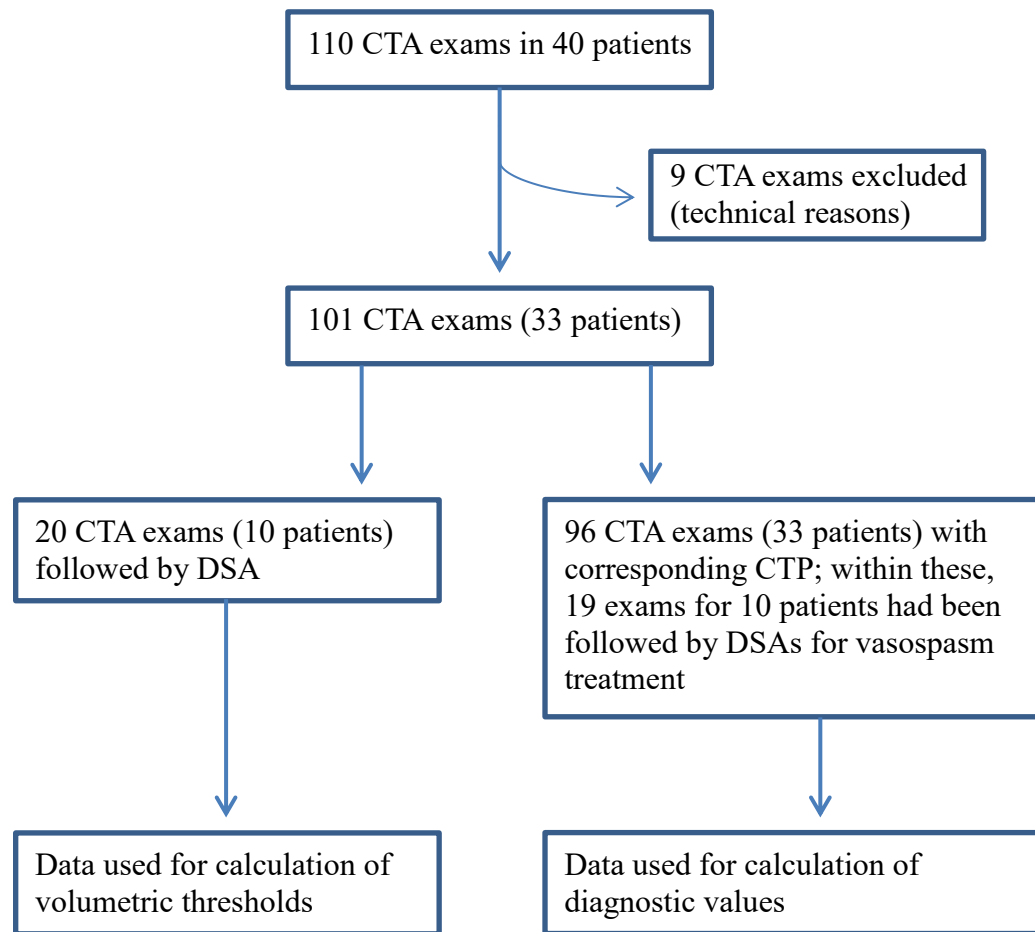

**Supplementary Figure 1.**

Patients and imaging data.
